# Supplementary material for: Beyond Conventional Drying: Improving the Quality of Dried Tremella fuciformis via a Heat-Integrated Pretreatment
Source: Research Square preprint supplement (doi:10.21203/rs.3.rs-8767418/v1), 2026-02-11
Supplement: Supplementary file 1 [file d1fb7cee0aaee0dfb1d9e02f.docx]

**Table 2.** Color changes of dried *T. fuciformis* via different pretreatments.

| **Groups** | | *L** | ***a**** | ***b**** | **ΔE** | **C** | **Appearance** |
| --- | --- | --- | --- | --- | --- | --- | --- |
| **Temperature** | **Time** |
| **CG** | | 53.50±1.40 | 4.28±0.27 | 15.68±0.92 | - | 16.25±0.91 | |  | | --- | |
| **70℃** | **3 min** | 58.12±1.11b | 1.41±0.28a | 12.22±1.40a | 6.94±0.35b | 12.30±1.42a |  |
| **5 min** | 55.38±2.72c | 0.97±0.16b | 9.62±1.29b | 6.48±1.13b | 10.33±0.94b |  |
| **7 min** | 62.47±1.97a | 0.96±0.41b | 12.13±1.41a | 11.06±1.77a | 11.51±0.48a | 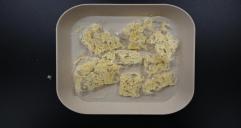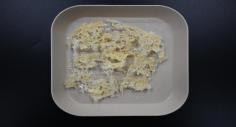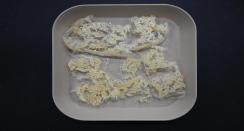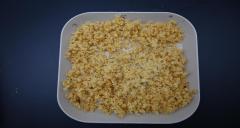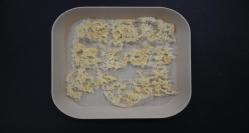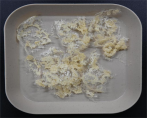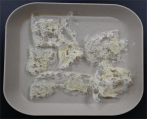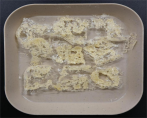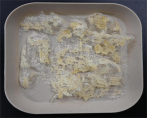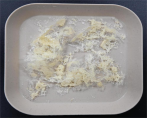 |
| **80℃** | **3 min** | 52.60±1.21c | 1.51±0.07a | 10.67±0.76a | 4.67±0.64c | 10.77±0.75a |  |
| **5 min** | 57.72±2.01b | 0.99±0.10b | 9.06±1.04b | 8.44±0.86b | 9.12±1.02b |  |
| **7 min** | 61.40±3.08a | 0.07±0.19c | 7.39±0.79c | 12.41±1.77a | 7.40±0.79c |  |
| **90℃** | **3 min** | 57.54±0.30c | 0.77±0.03a | 9.07±0.51a | 8.16±0.53c | 9.10±0.51a |  |
| **5 min** | 64.66±1.78a | -0.04±0.04c | 8.55±0.97a | 14.36±1.12a | 8.55±0.91a |  |
| **7 min** | 61.76±2.56b | 0.01±0.03b | 6.86±1.89b | 13.08±0.82b | 6.86±1.89b |  |

Note: Data are mean ± SD (n = 9), analyzed by t-test. Different letters within a column indicate significant differences at the same temperature but different times (*p* < 0.05).
